# Supplementary material for: De Novo Transcriptome Sequencing of Low Temperature-Treated Phlox subulata and Analysis of the Genes Involved in Cold Stress
Source: MDPI journal article supplement (doi:10.3390/ijms16059732), 2015-04-29
Supplement: s1 [file s1]

# Supplementary Information

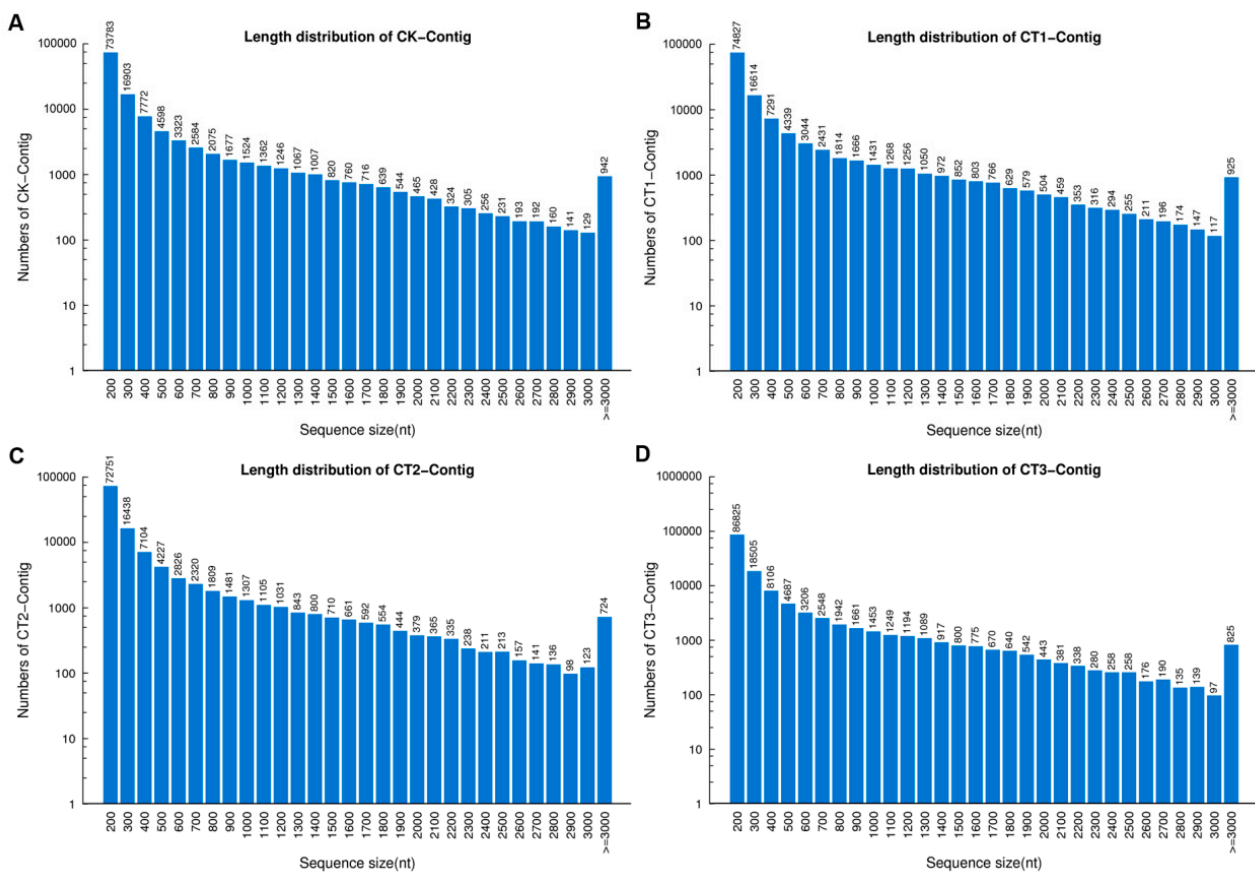

**Figure S1.** Length distribution of the contigs. The length distribution of contigs of CK sample (A); CT1 sample (B); CT2 sample (C); and CT3 sample (D).

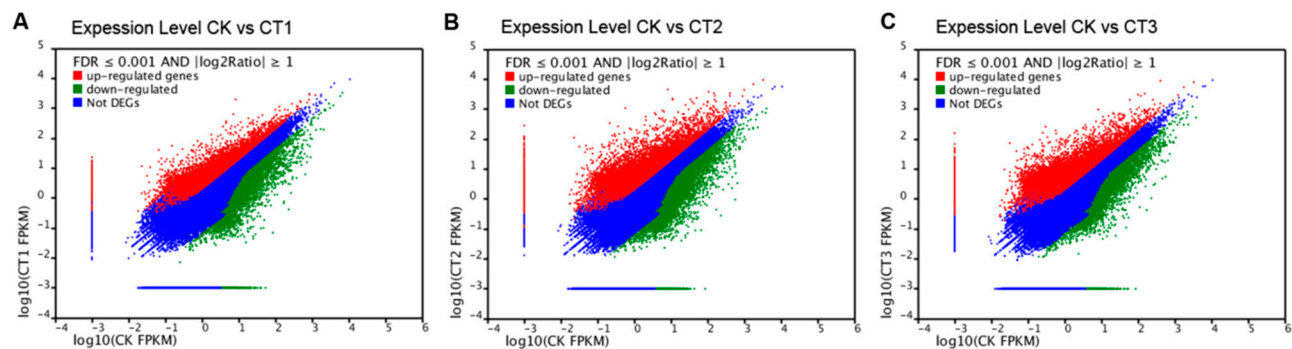

**Figure S2.** Distribution of differentially expressed genes (DEGs) in cold-treated (CT) samples compared with control sample (CK). We use “FDR (False Discovery Rate)  $\leq 0.001$  and the absolute value of  $\log_2\text{Ratio} \geq 1$ ” as the threshold to judge the significance of gene expression difference. Control plants were grown at 20 °C. CT1 (A); CT2 (B); CT3 (C), plants were treated under low temperature for 4, 0 and  $-10$  °C, respectively.

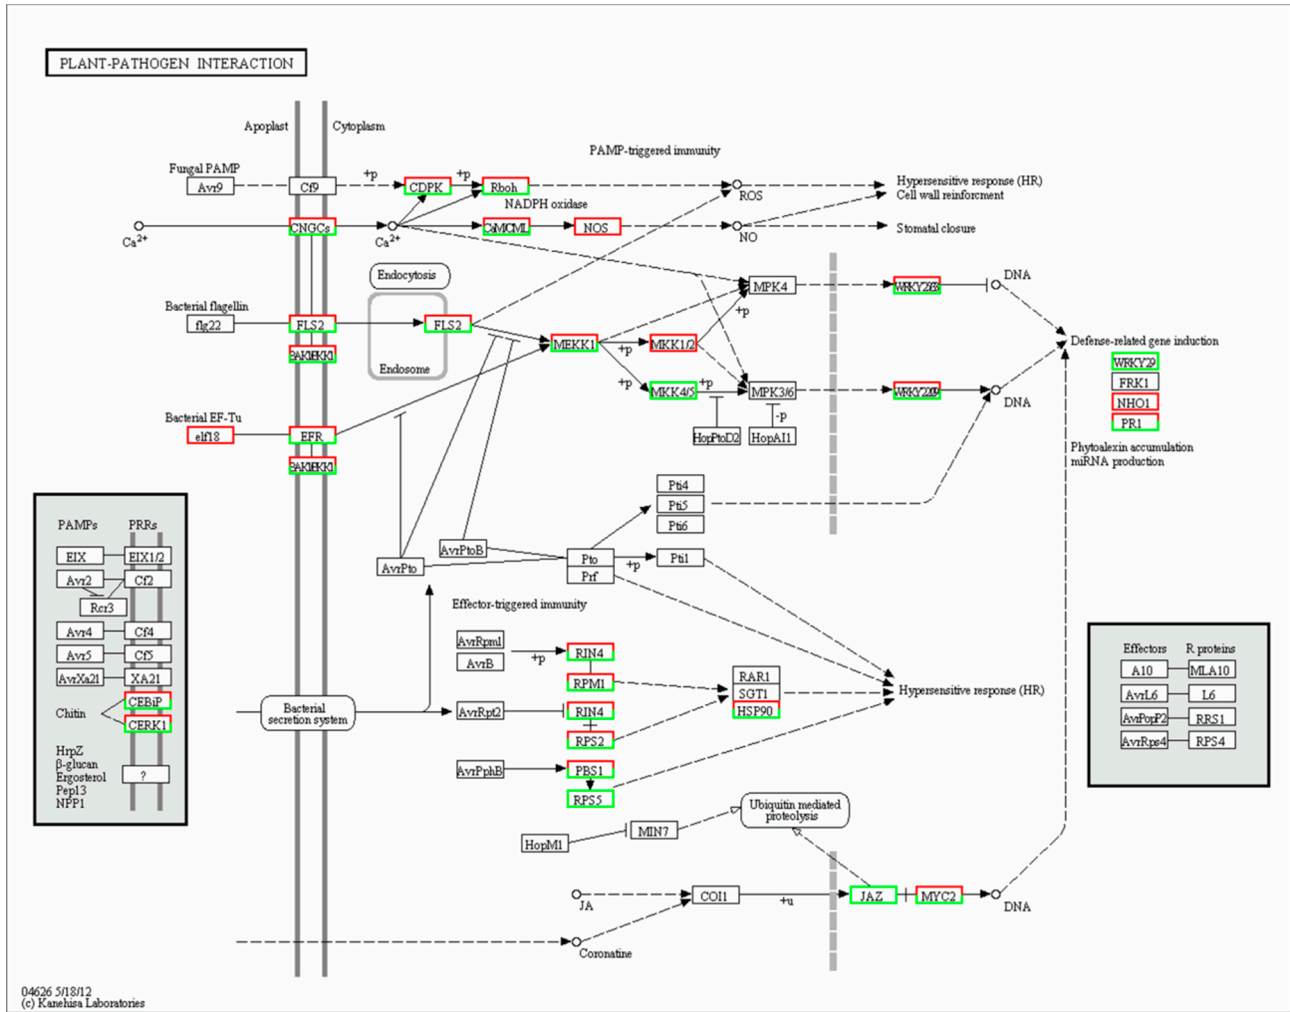

**Figure S3.** Detailed information of plant-pathogen interaction pathway in KEGG database. In the figure, up-regulated genes are marked with red borders while down-regulated genes are marked with green borders. Non-change genes are marked with black borders.

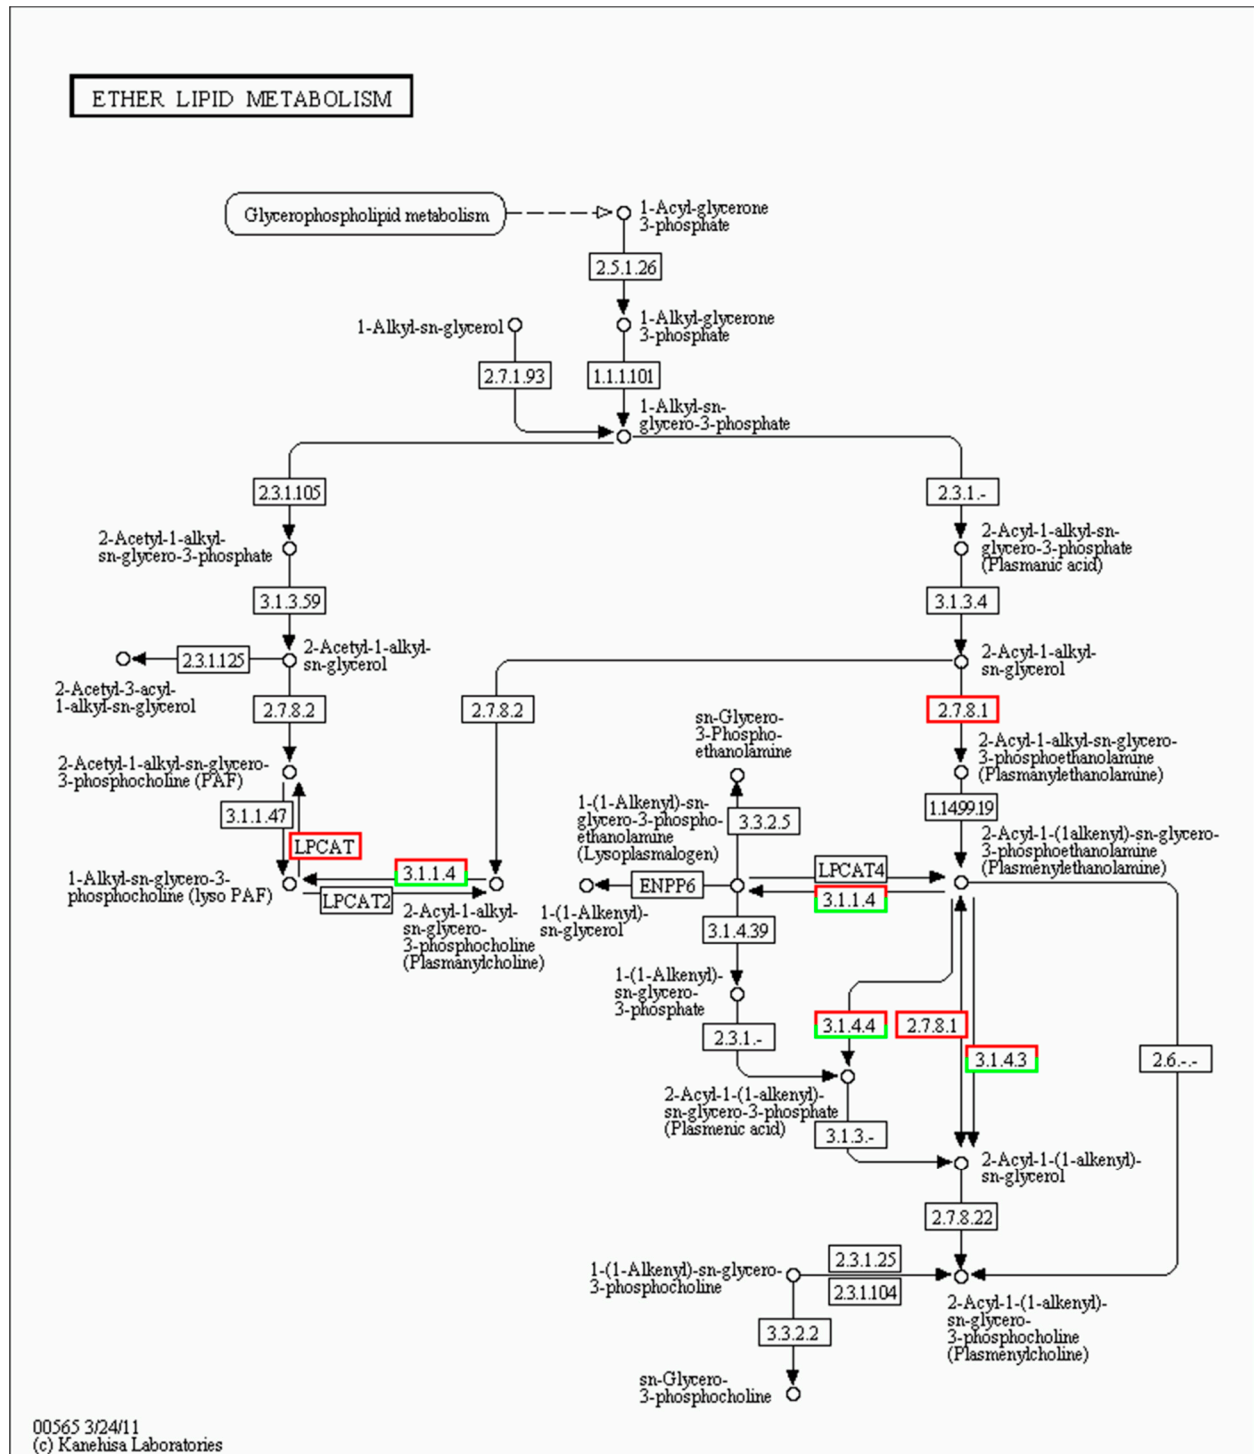

**Figure S4.** Detailed information of ether lipid metabolism pathway in KEGG database. In the figure, up-regulated genes are marked with red borders while down-regulated genes are marked with green borders. Non-change genes are marked with black borders.

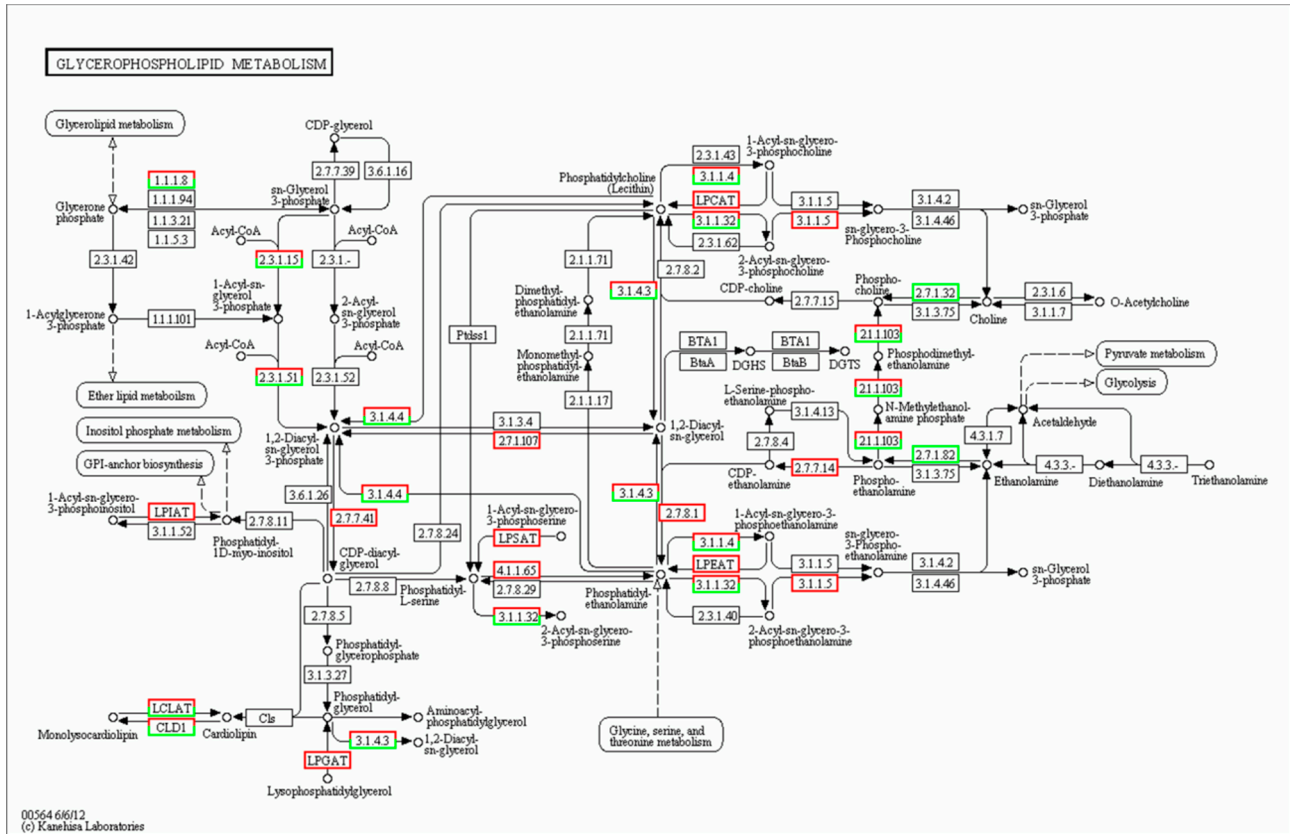

**Figure S5.** Detailed information of glycerophospholipid metabolism pathway in KEGG database. In the figure, up-regulated genes are marked with red borders while down-regulated genes are marked with green borders. Non-change genes are marked with black borders.
